# Supplementary material for: Edible Medicinal Guava Fruit (Psidium guajava L.) Are a Source of Anti-Biofilm Compounds against Pseudomonas aeruginosa
Source: MDPI journal article supplement (doi:10.3390/plants13081122), 2024-04-17
Supplement: s1 [file s1]

### Text S1. Phytochemical characterization of isolated compounds:

Compound 1 from fraction F1 was analyzed by HPLC-UV-MS. The chromatograms monitored at 448 nm highlight the presence of a major peak at 35.2 min; its UV spectrum is characteristic of a carotenoid with transition peaks at 468 (shoulder) and 444/498 [44-47]. The UV and mass spectra of this major compound match with those of lycopene and/or its isomers (Molecular Weight = 536 that corresponds to molecular formula,  $C_{29}H_{50}O$ ). To support this hypothesis, the analysis of a lycopene commercial reference in the same HPLC conditions showed identical retention time and UV/Mass spectra. Moreover, their co-injection showed no difference in the retention times, suggesting that the active compound 1 is effectively lycopene. (Figure S3).

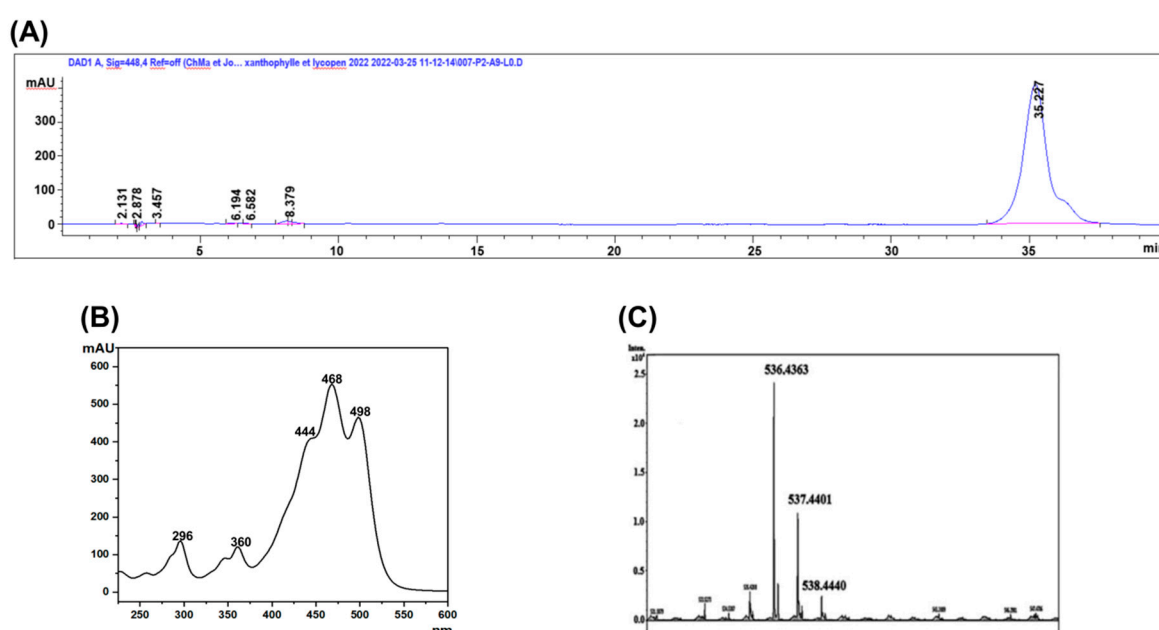

**Figure S3 : HPLC-UV-MS analysis of Lycopene**

(A) HPLC profile of lycopene monitored at 448 nm; (B) UV-DAD spectra of lycopene; (C) Mass spectra of lycopene isolated from *P. guajava*

Compounds 2 and 3 fraction F5 and F10, respectively were isolated as amorphous white solids and analyzed by NMR and MALDI-TOF.

MALDI-TOF analysis of compound 2 revealed a pseudomolecular ion at  $m/z$  397.381  $[M+H]^+$ . The  $^1H$ -NMR spectrum ( $CDCl_3$ , 500 MHz) of this compound (ppm) showed the presence of six methyl signals that appeared as two methyl singlets at  $\delta_H$  0.66, and 0.98 which corresponds to the angular methyl singlets. Three methyl doublets appeared at  $\delta_H$  0.79, 0.82, and  $\delta_H$  0.90, and a methyl triplet at  $\delta_H$  0.81 corresponding to the methyl protons. A proton corresponding to the hydroxyl group appeared as a multiplet at  $\delta_H$  3.50. The  $^{13}C$ -NMR spectrum ( $CDCl_3$ , 125 MHz) showed twenty-nine carbon signals made up of six methyl, eleven methylenes, nine methines and three quaternary carbon signals. The  $^{13}C$ -NMR also showed recognizable signals at  $\delta_C$  140.1 ppm and  $\delta_C$  121.9 ppm which are typical of alkene double bonds. The values at  $\delta_C$  19.6 and  $\delta_C$  12.1 ppm correspond to angular methyl carbon atoms. The signal at  $\delta_C$  72.0 ppm is assignable to the beta hydroxyl group attached to the carbon at position 3. Based on these results (Table S1) and by comparison with literature data, the spectrum peaks could be assigned to  $\beta$ -sitosterol [17].

MALDI-TOF data for compound 3 showed a pseudomolecular ion peak  $[M+H]^+$  at  $m/z$  576 suggesting the molecular formula  $C_{35}H_{60}O_6$ . The  $^1H$ -NMR spectra of this compound showed characteristic resonances for  $\beta$ -sitosterol ( $\delta_H$  5.4 for the olefinic proton and  $\delta_H$  3.79 for the carbonilic proton). A resonance at  $\delta_H$  4.9 is due to an anomeric proton indicating the presence of a glycoside linkage which was confirmed by resonances at  $\delta_H$  4.06, 4.08, 4.08, 3.97 and 4.4 which were assigned to H-2', H-3', H-4', H-5' and H-6', respectively and the sugar was identified as glucose. The  $^{13}C$ -NMR resolved 35 carbon resonances with characteristic sitosterol olefinic resonances at  $\delta_C$  140.5 and  $\delta_C$  121.91. HSQC correlation allowed to assign the resonance at  $\delta_C$  100.8 to the anomeric carbon. HMBC experiments confirmed the attachment of the sugar at C-3 and the methylene at  $\delta_C$  61.65 was assigned to the C-6' of the glucose.

**Table S1 :  $^1\text{H}$  and  $^{13}\text{C}$  NMR spectral data of  $\beta$ -sistosterol**

| Present study |               |                           |                           | Literature<br>[48]        |                           |
|---------------|---------------|---------------------------|---------------------------|---------------------------|---------------------------|
| C             | $\text{CH}_n$ | $\delta_{\text{C}}$ (ppm) | $\delta_{\text{H}}$ (ppm) | $\delta_{\text{C}}$ (ppm) | $\delta_{\text{H}}$ (ppm) |
| 1             | $\text{CH}_2$ | 37.5                      | 1.83                      | 37.21                     | 1.47                      |
| 2             | $\text{CH}_2$ | 31.9                      | 1.82                      | 31.61                     | 1.57                      |
| 3             | CH            | 72.0                      | 3.50                      | 71.81                     | 3.51                      |
| 4             | $\text{CH}_2$ | 42.5                      | 2.27                      | 42.29                     | 2.32                      |
| 5             | C             | 140.1                     |                           | 141.71                    |                           |
| 6             | CH            | 121.9                     | 5.33                      | 121.73                    | 5.34                      |
| 7             | $\text{CH}_2$ | 32.1                      | 1.97                      | 31.91                     | 2.01                      |
| 8             | CH            | 32.1                      | 1.42                      | 31.89                     | 1.67                      |
| 9             | CH            | 50.3                      | 0.91                      | 50.08                     | 1.52                      |
| 10            | C             | 36.7                      |                           | 36.48                     |                           |
| 11            | $\text{CH}_2$ | 21.3                      | 1.47                      | 21.05                     | 1.50                      |
| 12            | $\text{CH}_2$ | 40.0                      | 1.98                      | 39.73                     | 1.49                      |
| 13            | C             | 42.5                      |                           | 42.25                     |                           |
| 14            | CH            | 57.0                      | 0.97                      | 56.72                     | 1.50                      |
| 15            | $\text{CH}_2$ | 24.5                      | 1.56                      | 24.28                     | 1.59                      |
| 16            | CH            | 28.5                      | 1.82                      | 28.23                     | 1.93                      |
| 17            | CH            | 56.3                      | 1.09                      | 55.99                     | 1.47                      |
| 18            | $\text{CH}_3$ | 12.1                      | 0.66                      | 11.84                     | 0.66                      |
| 19            | $\text{CH}_3$ | 19.6                      | 0.98                      | 19.38                     | 1.03                      |
| 20            | CH            | 36.4                      | 1.34                      | 36.12                     | 1.61                      |
| 21            | $\text{CH}_3$ | 19.0                      | 0.90                      | 18.75                     | 0.94                      |
| 22            | $\text{CH}_2$ | 34.2                      | 1.30                      | 33.90                     | 0.93                      |
| 23            | $\text{CH}_2$ | 26.3                      | 1.14                      | 25.99                     | 1.15                      |
| 24            | CH            | 46.1                      | 0.91                      | 45.78                     | 1.38                      |
| 25            | CH            | 29.4                      | 1.64                      | 29.08                     | 1.64                      |
| 26            | $\text{CH}_3$ | 20.0                      | 0.81                      | 19.81                     | 0.84                      |
| 27            | $\text{CH}_3$ | 19.4                      | 0.79                      | 18.99                     | 0.62                      |
| 28            | $\text{CH}_2$ | 23.3                      | 1.25                      | 23.02                     | 1.08                      |
| 29            | $\text{CH}_3$ | 12.2                      | 0.82                      | 11.96                     | 0.83                      |

**Table S2 :  $^1\text{H}$  and  $^{13}\text{C}$  NMR spectral data of Sito-G**

| Present study |               |                           |                           | Literature<br>[49]        |                           |
|---------------|---------------|---------------------------|---------------------------|---------------------------|---------------------------|
| C             | $\text{CH}_n$ | $\delta_{\text{C}}$ (ppm) | $\delta_{\text{H}}$ (ppm) | $\delta_{\text{C}}$ (ppm) | $\delta_{\text{H}}$ (ppm) |
| 1             | $\text{CH}_2$ | 36.92                     | 1.81                      | 36.85                     | 1.25                      |
| 2             | $\text{CH}_2$ | 29.26                     | 2.12                      | 29.12                     | 1.33                      |
| 3             | CH            | 76.98                     | 3.79                      | 76.99                     | 3.13                      |
| 4             | $\text{CH}_2$ | 40                        | 2.69                      | 42.14                     | 2.14                      |
| 5             | C             | 140.5                     |                           | 140.51                    |                           |
| 6             | CH            | 121.91                    | 5.4                       | 121.29                    | 5.34                      |
| 7             | $\text{CH}_2$ | 31.54                     | 1.98                      | 31.41                     | 1.73                      |
| 8             | CH            | 31.67                     | 1.44                      | 31.46                     | 1.22                      |
| 9             | CH            | 49.85                     | 0.96                      | 49.83                     | 1.22                      |
| 10            | C             | 36.92                     |                           | 36.27                     |                           |
| 11            | $\text{CH}_2$ | 20.72                     | 1.5                       | 20.21                     | 1.33                      |
| 12            | $\text{CH}_2$ | 38.36                     | 2.05                      | 38.20                     | 1.33                      |
| 13            | C             | 39.42                     |                           | 41.91                     |                           |
| 14            | CH            | 56.42                     | 1                         | 56.36                     | 1.22                      |
| 15            | $\text{CH}_2$ | 23.94                     | 1.61                      | 23.79                     | 1.73                      |
| 16            | $\text{CH}_2$ | 27.76                     | 1.91                      | 27.76                     | 1.73                      |
| 17            | CH            | 55.71                     | 1.15                      | 55.66                     | 1.73                      |
| 18            | $\text{CH}_3$ | 11.54                     | 0.73                      | 11.27                     | 0.62                      |
| 19            | $\text{CH}_3$ | 19                        | 1.00                      | 19.10                     | 0.94                      |
| 20            | CH            | 35.80                     | 1.44                      | 35.70                     | 1.32                      |
| 21            | $\text{CH}_3$ | 18.69                     | 1.04                      | 18.69                     | 0.84                      |
| 22            | $\text{CH}_2$ | 33.63                     | 1.44                      | 33.51                     | 1.73                      |
| 23            | $\text{CH}_2$ | 25.71                     | 1.35                      | 25.64                     | 1.73                      |
| 24            | CH            | 45.52                     | 1.03                      | 45.49                     | 1.12                      |
| 25            | CH            | 28.89                     | 1.74                      | 28.74                     | 2.14                      |
| 26            | $\text{CH}_3$ | 18.69                     | 0.93                      | 18.69                     | 0.75                      |
| 27            | $\text{CH}_3$ | 18.39                     | 0.92                      | 18.35                     | 0.73                      |
| 28            | $\text{CH}_2$ | 22.71                     | 1.29                      | 22.60                     | 1.33                      |
| 29            | $\text{CH}_3$ | 11.63                     | 0.96                      | 12.29                     | 0.77                      |
| 1'            | CH            | 100.85                    | 4.9                       | 100.82                    | 4.11                      |
| 2'            | CH            | 73.30                     | 4.06                      | 73.21                     | 3.14                      |
| 3'            | CH            | 76.17                     | 4.08                      | 76.18                     | 3.14                      |
| 4'            | CH            | 69.97                     | 4.08                      | 69.90                     | 3.14                      |
| 5'            | CH            | 75.51                     | 3.97                      | 75.62                     | 3.06                      |
| 6'            | $\text{CH}_2$ | 61.65                     | 4.4                       | 61.36                     | 2.94                      |
