# Supplementary material for: Edible Medicinal Guava Fruit (Psidium guajava L.) Are a Source of Anti-Biofilm Compounds against Pseudomonas aeruginosa
Source: Plants (Basel). 2024 Apr 17;13(8):1122. doi: 10.3390/plants13081122 (PMC11054768; doi:10.3390/plants13081122)
Supplement: Supplementary file 1 [file plants-13-01122-s001.zip]

Archive with 6 entries (6 files):
- FIgureS1.tif
- FigureS2.tif
- FigureS3.tif
- FigureS4.tif
- FigureS5.tif
- Text S1. Phytochemical characterization- proofread version.pdf
